# Supplementary material
Source: PubMed Central journal article supplement (PMC6926455)
Supplement: supp_RA119.009744_153443_2_supp_425399_q0lv4m.pdf [file supp_RA119.009744_153443_2_supp_425399_q0lv4m.pdf]

**Collagen receptor crosstalk determines  $\alpha$ -smooth muscle actin-dependent collagen gene expression in angiotensin II-stimulated cardiac fibroblasts**

Harikrishnan V<sup>1</sup>, Allen Sam Titus<sup>1</sup>, Randy T. Cowling<sup>2</sup>, Shivakumar Kailasam<sup>1\*</sup>

<sup>1</sup> Division of Cellular and Molecular Cardiology, Sree Chitra Tirunal Institute for Medical Sciences and Technology, Trivandrum, India

<sup>2</sup> Division of Cardiovascular Medicine, Department of Medicine, University of California-San Diego, La Jolla, California, USA

\* Corresponding author

**Basal expression data : Supplementary Figures 1-4**

## Supplementary Figure 1:

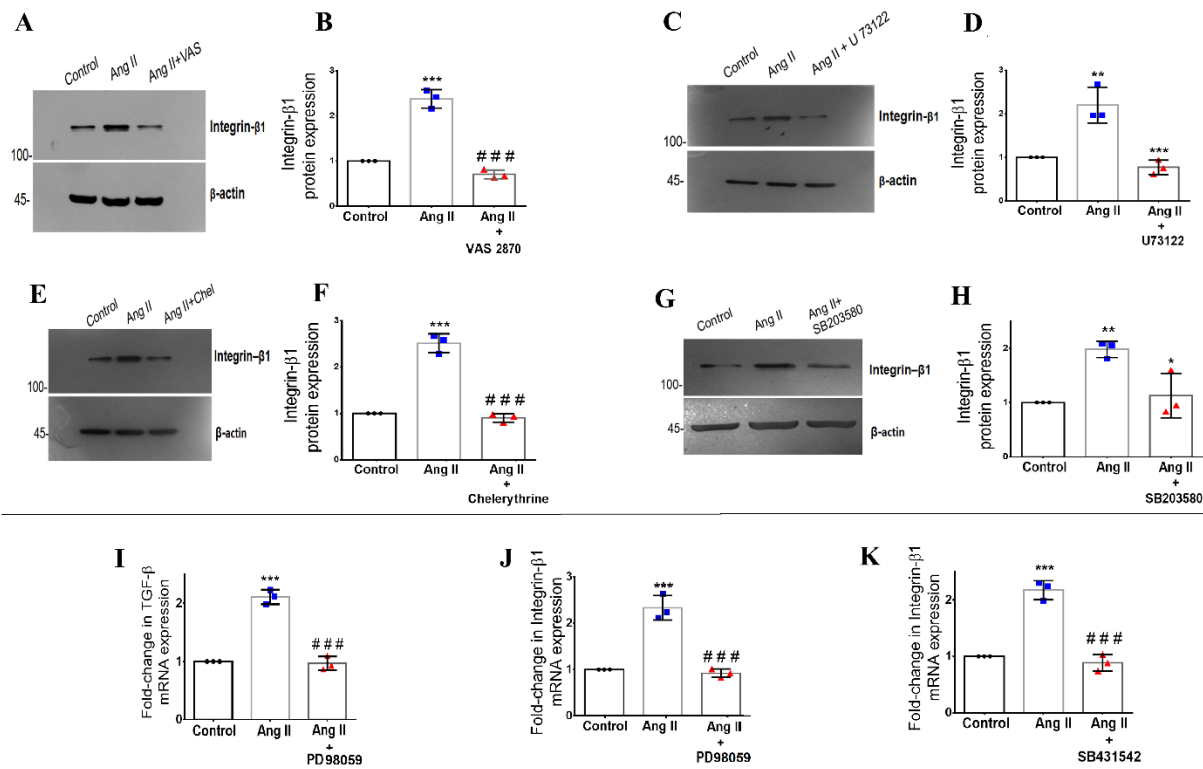

## Supplementary Figure 1

**(A-H)** Subconfluent quiescent cultures of cardiac fibroblasts in M199 were pre-treated with chemical inhibitors for NOX, PLC, PKC and p38 MAPK for 1 h and, subsequently, with Ang II. Protein was isolated at 12 h post-Ang II treatment and subjected to western blot analysis for detection of Integrin-β1, with β-actin as loading control. **(A,B)** NOX inhibitor - VAS2870, \*\*\*  $p < 0.001$  vs. control, ###  $p < 0.001$  vs. Ang II. **(C,D)** PLC inhibitor - U73122, \*\*  $p < 0.01$  vs. control, \*\*\*  $p < 0.001$  vs. Ang II. **(E,F)** PKC inhibitor – Chelerythrine, \*\*\*  $p < 0.001$  vs. control, ###  $p < 0.001$  vs. Ang II and **(G,H)** p38 MAPK inhibitor – SB203580, \*\*  $p < 0.01$  vs. control, \*  $p < 0.05$  vs. Ang II. **(I,J)** Subconfluent quiescent cultures of cardiac fibroblasts were pre-treated with ERK1/2 MAPK inhibitor

(PD98059) for 1 h and, subsequently, with Ang II. **(I)** TGF- $\beta$ 1 mRNA levels were determined by RT-qPCR analysis at 6 h of Ang II treatment.  $\beta$ -actin served as the endogenous control. \*\*\*  $p < 0.001$  vs. control, ###  $p < 0.001$  vs. Ang II. **(J)** Integrin- $\beta$ 1 mRNA levels were determined by RT-qPCR analysis at 6 h of Ang II treatment.  $\beta$ -actin served as the endogenous control. \*\*\*  $p < 0.001$  vs. control, ###  $p < 0.001$  vs. Ang II. Subconfluent quiescent cultures of cardiac fibroblasts were pre-treated with TGF- $\beta$ 1 inhibitor (SB431542) for 1 h and, subsequently, with Ang II. **(K)** Integrin- $\beta$ 1 mRNA levels were determined by RT-qPCR analysis at 6 h of Ang II treatment.  $\beta$ -actin served as the endogenous control. \*\*\*  $p < 0.001$  vs. control, ###  $p < 0.001$  vs. Ang II. Data are representative of three independent experiments,  $n=3$ . Error bars represent SD.

## Supplementary Figure 2

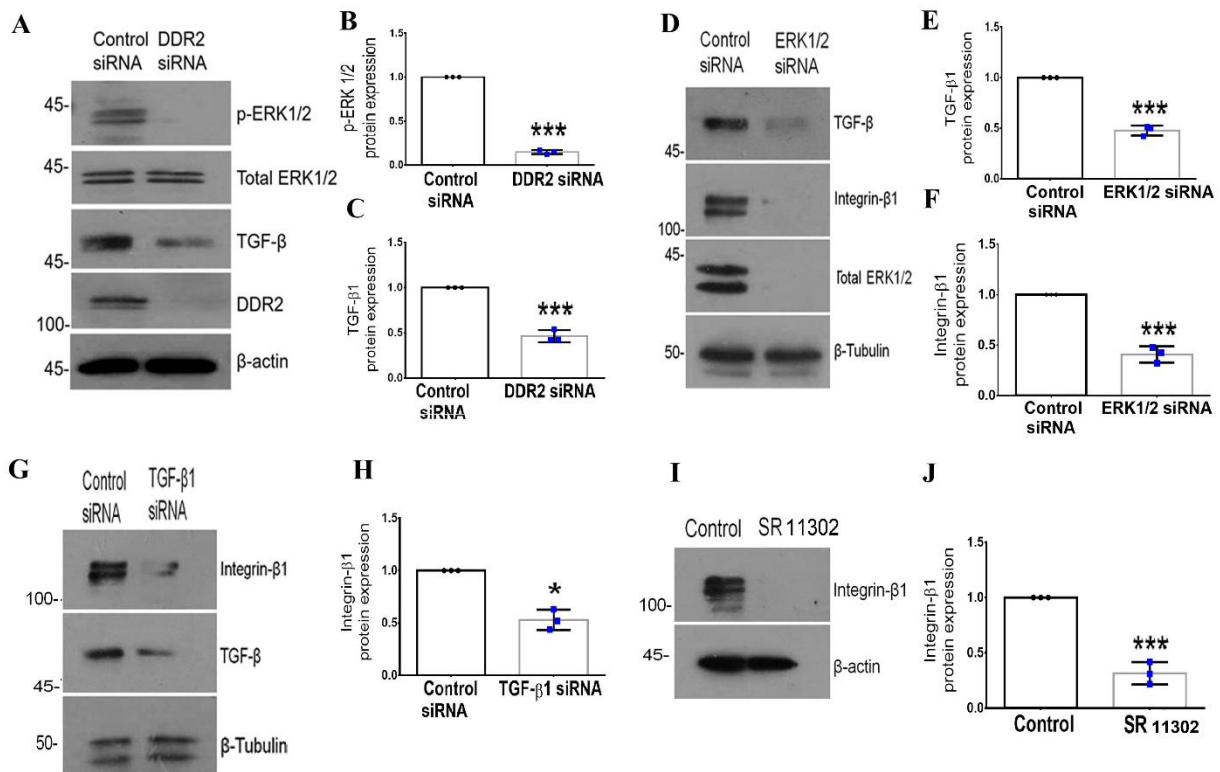

## Supplementary Figure. 2

Cardiac fibroblasts were transiently transfected with DDR2 siRNA or scrambled siRNA (control). **(A,B)** Phospho-ERK1/2 activation was examined by western blot analysis and normalized to total ERK1/2 levels. \*\*\*  $p < 0.001$  vs. control. **(A,C)** TGF- $\beta$ 1 protein expression was examined by western blot analysis, with  $\beta$ -actin as loading control. \*\*\*  $p < 0.001$  vs. control. Cardiac fibroblasts were transiently transfected with ERK1/2 siRNA or scrambled siRNA (control). **(D,E,F)** TGF- $\beta$ 1 and Integrin- $\beta$ 1 protein expression was examined by western blot analysis with  $\beta$ -Tubulin as loading control. \*\*\*  $p < 0.001$  vs. control. Cardiac fibroblasts were transiently transfected with TGF- $\beta$ 1 siRNA or scrambled siRNA (control). **(G,H)** Integrin- $\beta$ 1 protein expression was examined by western blot analysis, with  $\beta$ -Tubulin as loading control. \*  $p < 0.05$  vs. control. Subconfluent quiescent cultures of cardiac fibroblasts were treated with AP-1 inhibitor (SR11302). **(I,J)** Protein was isolated at 12 h post-treatment and subjected to western blot analysis for detection of Integrin- $\beta$ 1, with  $\beta$ -actin as loading control. \*\*\*  $p < 0.001$  vs. control. Data are representative of three independent experiments,  $n=3$ . Error bars represent SD.

### Supplementary Figure 3

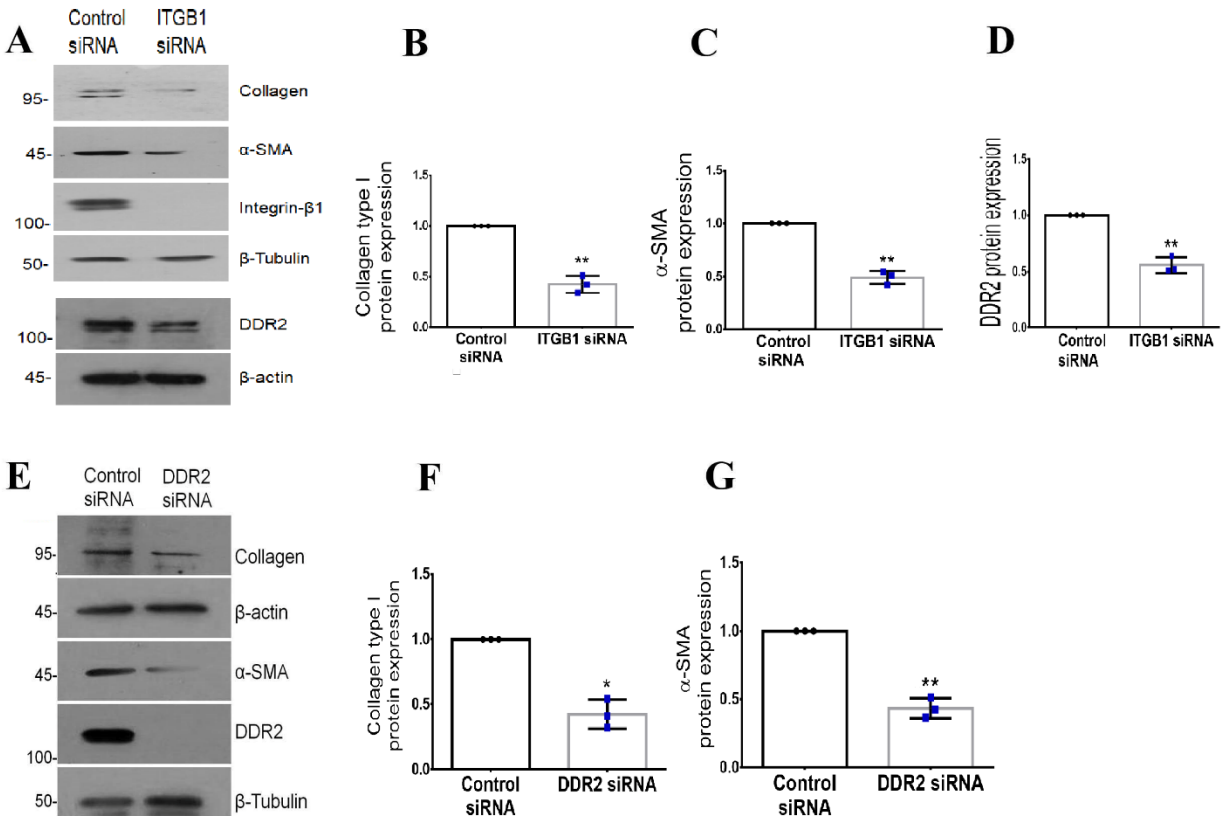

### Supplementary Figure 3

**(A-D)** Cardiac fibroblasts were transiently transfected with Integrin-β1 siRNA or scrambled siRNA (control). Collagen alpha1(I), α-SMA and DDR2 protein levels were examined by western blot analysis with β-Tubulin as loading control for Collagen alpha1(I) and α-SMA and β-actin as loading control for DDR2. \*\*  $p < 0.01$  vs. control. **(E-G)** Cardiac fibroblasts were transiently transfected with DDR2 siRNA or scrambled siRNA (control). Collagen alpha1(I) and α-SMA protein levels were analyzed by western blot analysis with β-actin and β-Tubulin as loading controls. Collagen alpha1(I)- \*  $p < 0.05$  vs. control. α-SMA- \*\*  $p < 0.01$  vs. control. Data are representative of three independent experiments,  $n=3$ . Error bars represent SD.

## Supplementary Figure 4

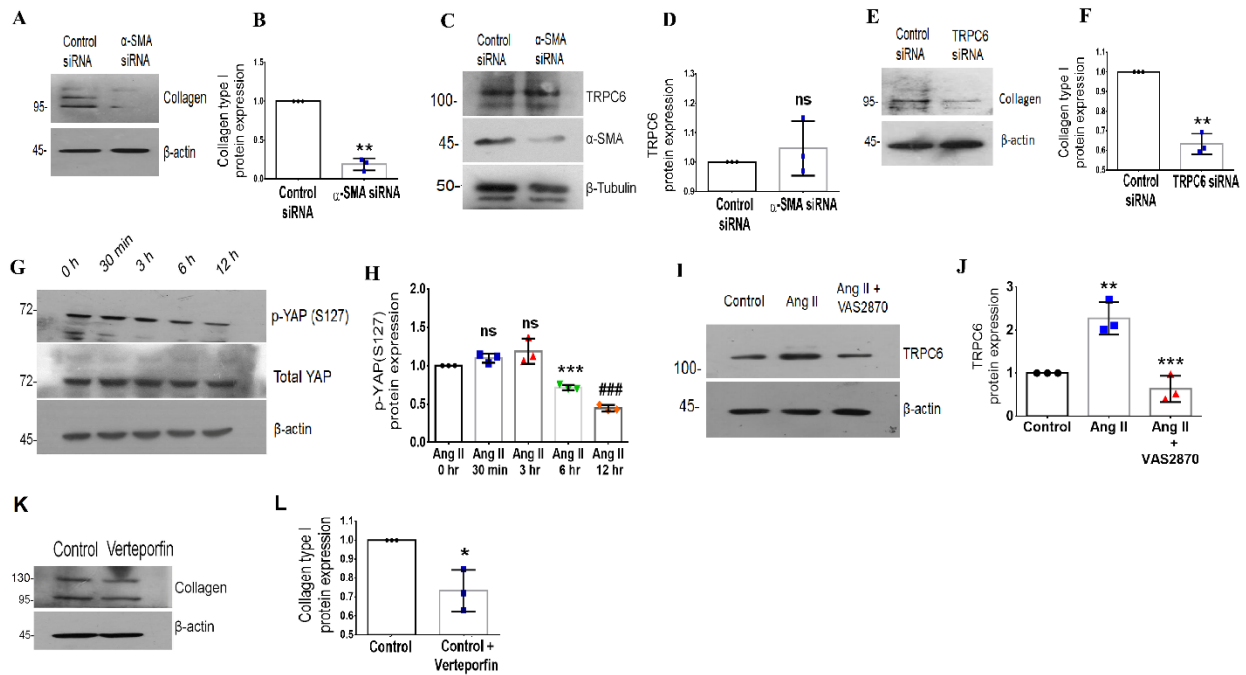

## Supplementary Figure 4

**(A-D)** Cardiac fibroblasts were transiently transfected with  $\alpha$ -SMA siRNA or scrambled siRNA (control). Collagen alpha1(I) and TRPC6 protein expression levels were examined by western blot analysis and normalized to  $\beta$ -actin and  $\beta$ -Tubulin, respectively. \*\*  $p < 0.01$  vs. control, ns is not significant vs. control. **(E,F)** Cardiac fibroblasts were transiently transfected with TRPC6 siRNA or scrambled siRNA (control). Collagen alpha1(I) protein expression levels were examined by western blot analysis and normalized to  $\beta$ -actin. \*\*  $p < 0.01$  vs. control. **(G,H)** Cardiac fibroblasts were serum-deprived for 24 h, followed by treatment with Ang II. Phosphorylation status of YAP at S127 was analyzed at 0 h, 30 min, 3 h, 6 h and 12 h post Ang II treatment by western blot analysis and normalized to Total YAP. ns, not significant, vs Ang II 0 h, \*\*\* $p < 0.001$  vs Ang II 0 h, ###  $p < 0.001$  vs Ang II 0 h. **(I,J)** Subconfluent quiescent cultures of cardiac fibroblasts in M199 were pre-treated with chemical inhibitor of NOX (VAS2870) for 1 h and, subsequently, with Ang II. Protein was isolated at 12 h post-Ang II treatment and subjected to western blot analysis for detection of TRPC6, with  $\beta$ -actin as loading control. \*\*  $p < 0.01$  vs. control, \*\*\*  $p < 0.001$

vs. Ang II. **(K,L)** Subconfluent quiescent cultures of cardiac fibroblasts were treated with YAP inhibitor (Verteporfin). Protein was isolated at 12 h post-treatment and subjected to western blot analysis for detection of collagen alpha1(I), with  $\beta$ -actin as loading control. \*  $p < 0.05$  vs. control. Data are representative of three independent experiments,  $n=3$ . Error bars represent SD.
